# Supplementary material
Source: PubMed Central journal article supplement (PMC6390451)
Supplement: ajn-0048-0369-s01.pdf [file ajn-0048-0369-s01.pdf]

**Table S1.** Characteristics of the patients that underwent treatment with hemodialysis or peritoneal dialysis after inclusion but did not undergo follow-up CAC measurements ( $n=35$ ), compared to the longitudinal cohort ( $n=57$ ).

|                                                              | No follow-up CAC measurement<br>(n = 35) | Longitudinal cohort<br>(n = 57) | P for difference with longitudinal cohort |
|--------------------------------------------------------------|------------------------------------------|---------------------------------|-------------------------------------------|
| <b>Demographics and medical history</b>                      |                                          |                                 |                                           |
| Age (years)                                                  | 52 ±14                                   | 52 ±13                          | 0.86                                      |
| Male sex (%)                                                 | 25 (71%)                                 | 37 (65%)                        | 0.68                                      |
| Body mass index (kg/m <sup>2</sup> )                         | 26.2 ±4.3                                | 25.8 ±4.5                       | 0.68                                      |
| Systolic blood pressure (mmHg)                               | 137 ±19                                  | 138 ±20                         | 0.87                                      |
| Diastolic blood pressure (mmHg)                              | 79 ±12                                   | 80 ±12                          | 0.74                                      |
| Diabetes mellitus (%)                                        | 9 (26%)                                  | 7 (12%)                         | 0.17                                      |
| Cardiovascular disease (%)                                   | 8 (23%)                                  | 12 (21%)                        | 0.99                                      |
| Active smoker (%)                                            | 8 (23%)                                  | 5 (9%)                          | 0.11                                      |
| <b>History of kidney disease</b>                             |                                          |                                 |                                           |
| Dialysis vintage (months)                                    | 23 (13–46)                               | 17 (8–49)                       | 0.30                                      |
| Cause of end-stage renal disease (%)                         |                                          |                                 | 0.17                                      |
| • Cystic kidney disease                                      | 1 (3%)                                   | 9 (16%)                         |                                           |
| • Interstitial nephritis                                     | 3 (9%)                                   | 3 (5%)                          |                                           |
| • Glomerulonephritis                                         | 12 (34%)                                 | 14 (25%)                        |                                           |
| • Vascular disease                                           | 8 (23%)                                  | 13 (23%)                        |                                           |
| • Diabetic nephropathy                                       | 3 (9%)                                   | 6 (11%)                         |                                           |
| • Other                                                      | 3 (9%)                                   | 10 (18%)                        |                                           |
| • Unknown                                                    | 5 (14%)                                  | 2 (4%)                          |                                           |
| <b>Dialysis therapy and kidney function</b>                  |                                          |                                 |                                           |
| Dialysis therapy (%)                                         |                                          |                                 | 0.36                                      |
| • Hemodialysis                                               | 25 (71%)                                 | 34 (60%)                        |                                           |
| • Peritoneal dialysis                                        | 10 (29%)                                 | 23 (40%)                        |                                           |
| Kidney function                                              |                                          |                                 |                                           |
| • Residual urine production ≥100mL/24h (%)                   | 19 (54%)                                 | 34 (60%)                        | 0.90                                      |
| <b>Baseline CAC score</b>                                    |                                          |                                 |                                           |
| Volume score (mm <sup>3</sup> )                              | 217 (1–1183)                             | 97 (3–750)                      | 0.44                                      |
| Agatston score                                               | 264 (0–1383)                             | 103 (1–816)                     | 0.45                                      |
| Zero calcification (%)                                       | 9 (26%)                                  | 14 (25%)                        | 0.99                                      |
| <b>Reasons for not undergoing follow-up CAC measurements</b> |                                          |                                 |                                           |
| • Kidney transplantation                                     | 14 (40%)                                 |                                 |                                           |
| • Loss to follow-up                                          | 7 (20%)                                  |                                 |                                           |
| • Change of dialysis modality                                | 7 (20%)                                  |                                 |                                           |
| • Withdrawal of informed consent                             | 4 (11%)                                  |                                 |                                           |
| • Death                                                      | 3 (9%)                                   |                                 |                                           |

**Table S2.** Regression coefficients of linear regression of dialysis modality and natural log-transformed dp-ucMGP, fetuin-A, and osteoprotegerin, in 34 patients on hemodialysis and 23 on peritoneal dialysis. Reference is hemodialysis.

|                               | Hemodialysis<br>(n = 34) | Peritoneal dialysis<br>(n = 23) |                        |
|-------------------------------|--------------------------|---------------------------------|------------------------|
|                               |                          | <i>Crude</i>                    | <i>Adjusted*</i>       |
| <b>Log (dp-ucMGP)</b>         | 1.0<br>(reference)       | -0.39<br>(-0.86, 0.09)          | -0.15<br>(-0.66, 0.35) |
| <b>Fetuin-A (g/L)</b>         | 1.0<br>(reference)       | 0.01<br>(-0.03, 0.05)           | 0.00<br>(-0.04, 0.05)  |
| <b>Osteoprotegerin (µg/L)</b> | 1.0<br>(reference)       | 0.08<br>(-0.70, 0.87)           | 0.83<br>(0.13, 1.52)   |

Abbreviations: dp-ucMGP: desphospho-uncarboxylated matrix Gla protein. 95% confidence intervals are shown between brackets.

\*Adjusted for age (years), sex (male/female), presence of diabetes mellitus (yes/no), dialysis vintage (months), presence of residual urine production  $\geq 100$  mL/24h (yes/no), and vitamin K antagonist use (yes/no). Dp-ucMGP levels were right-skewed and were therefore natural log-transformed.

**Fig S1.** Distribution of calcium volume scores in 134 patients on dialysis at inclusion, stratified by dialysis modality, displayed as a smoothed histogram (kernel density estimates).

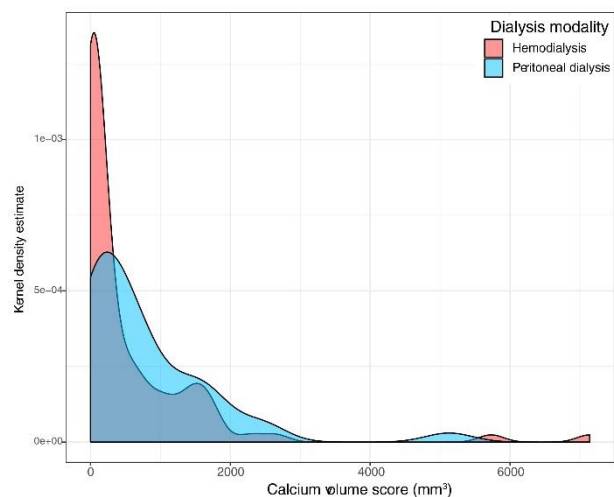

**Figure legend:** red shaded area: hemodialysis; blue shaded area: peritoneal dialysis. Note that the area under the curve of the kernel density estimates amounts to 1 per group.
